# Supplementary material for: Correlative Analysis of the Dimensional Properties of Bipyramidal Titania Nanoparticles by Complementing Electron Microscopy with Other Methods
Source: MDPI journal article supplement (doi:10.3390/nano11123359), 2021-12-10
Supplement: s1 [file s1]

Supplementary Information

# Correlative Analysis of the Dimensional Properties of Bipyramidal Titania Nanoparticles by Complementing Electron Microscopy with Other Methods

Loïc Crouzier <sup>1,\*</sup>, Nicolas Feltin <sup>1</sup>, Alexandra Delvallée <sup>1</sup>, Francesco Pellegrino <sup>2</sup>, Valter Maurino <sup>2</sup>, Grzegorz Cios <sup>3</sup>, Tomasz Tokarski <sup>3</sup>, Christoph Salzmann <sup>4</sup>, Jerome Deumer <sup>5</sup>, Christian Gollwitzer <sup>5</sup> and Vasile-Dan Hodoroaba <sup>4</sup>

- <sup>1</sup> Laboratoire National de métrologie et d'Essais (LNE), 29 Avenue Roger Hennequin, CEDEX, 78197 Trappes, France; nicolas.feltin@lne.fr (N.F.); Alexandra.Delvallee@lne.fr (A.D.)
  - <sup>2</sup> Dipartimento di Chimica and NIS Inter-Department Centre, University of Torino, Via P. Giuria 7, 10125 Torino, Italy; francesco.pellegrino@unito.it (F.P.); valter.maurino@unito.it (V.M.)
  - <sup>3</sup> Academic Centre for Materials and Nanotechnology, AGH University of Science and Technology, Mickiewicza 30, 30-059 Krakow, Poland; ciosu@agh.edu.pl (G.C.); tokarski@agh.edu.pl (T.T.)
  - <sup>4</sup> Federal Institute for Materials Research and Testing (BAM), Unter den Eichen 44-46, 12205 Berlin, Germany; ch.salzmann@web.de (C.S.); dan.hodoroaba@bam.de (V.-D.H.)
  - <sup>5</sup> Physikalisch-Technische Bundesanstalt (PTB), Abbestraße 2–12, 10587 Berlin, Germany; jerome.deumer@ptb.de (J.D.); christian.gollwitzer@ptb.de (C.G.)
- \* Correspondence: Loic.Crouzier@lne.fr

**Citation:** Crouzier, L.; Feltin, N.; Delvallée, A.; Pellegrino, F.; Maurino, V.; Cios, G.; Tokarski, T.; Salzmann, C.; Deumer, J.; Gollwitzer, C.; Hodoroaba, V.-D.; Correlative Analysis of the Dimensional Properties of Bipyramidal Titania Nanoparticles by Complementing Electron Microscopy with Other Methods. *Nanomaterials* **2021**, *11*, 3359. <https://doi.org/10.3390/nano11123359>

Academic Editor: David Marrero-López

Received: 30 September 2021  
Accepted: 8 December 2021  
Published: 10 December 2021

**Publisher's Note:** MDPI stays neutral with regard to jurisdictional claims in published maps and institutional affiliations.

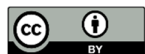

**Copyright:** © 2021 by the author. Licensee MDPI, Basel, Switzerland. This article is an open access article distributed under the terms and conditions of the Creative Commons Attribution (CC BY) license (<https://creativecommons.org/licenses/by/4.0/>).

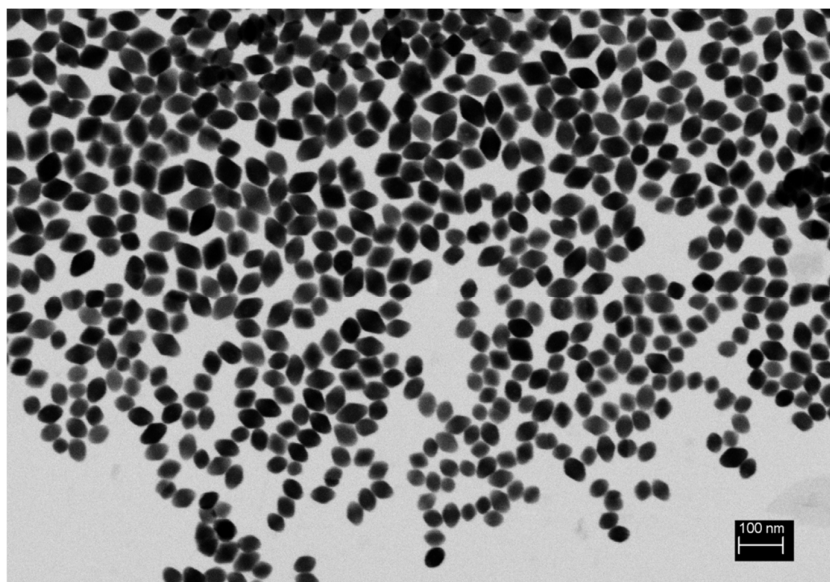

**Figure S1.** STEM-in-SEM image, taken at 20 kV, of the particles shown in Figure 3.

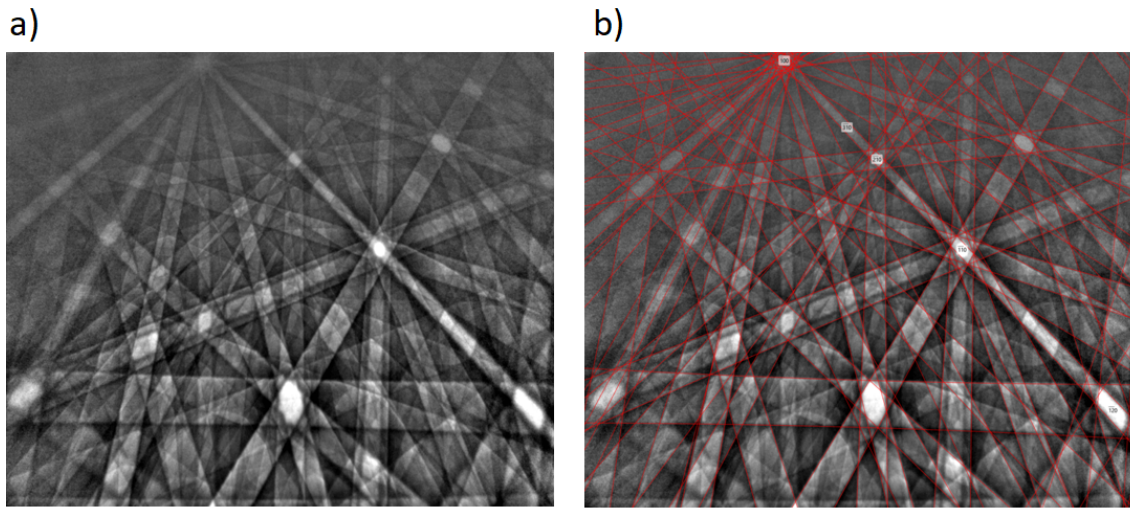

**Figure S2.** (a) Transmission Kikuchi diffraction pattern of anatase bipyramid nanoparticles and (b) indexed pattern with the Aztec acquisition software.

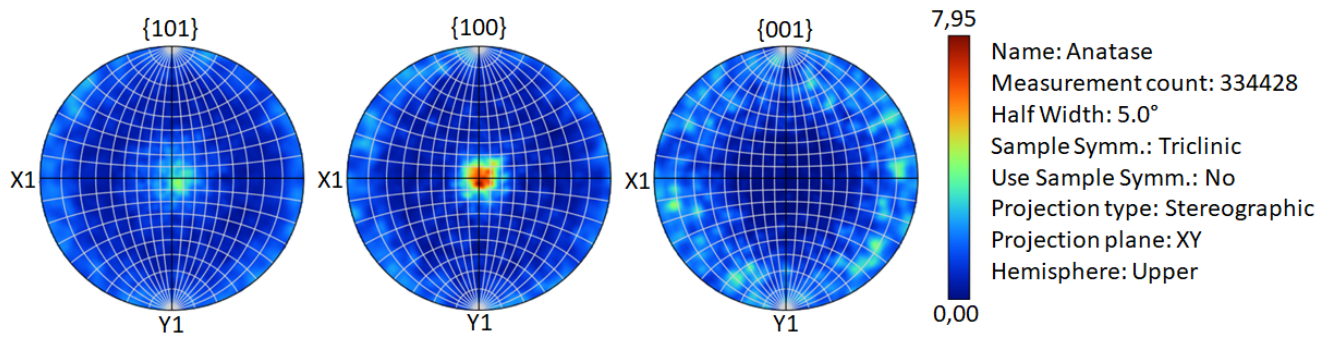

**Figure S3.** Pole figures of {101}, {100}, and {001} from the map presented in Figure 9.

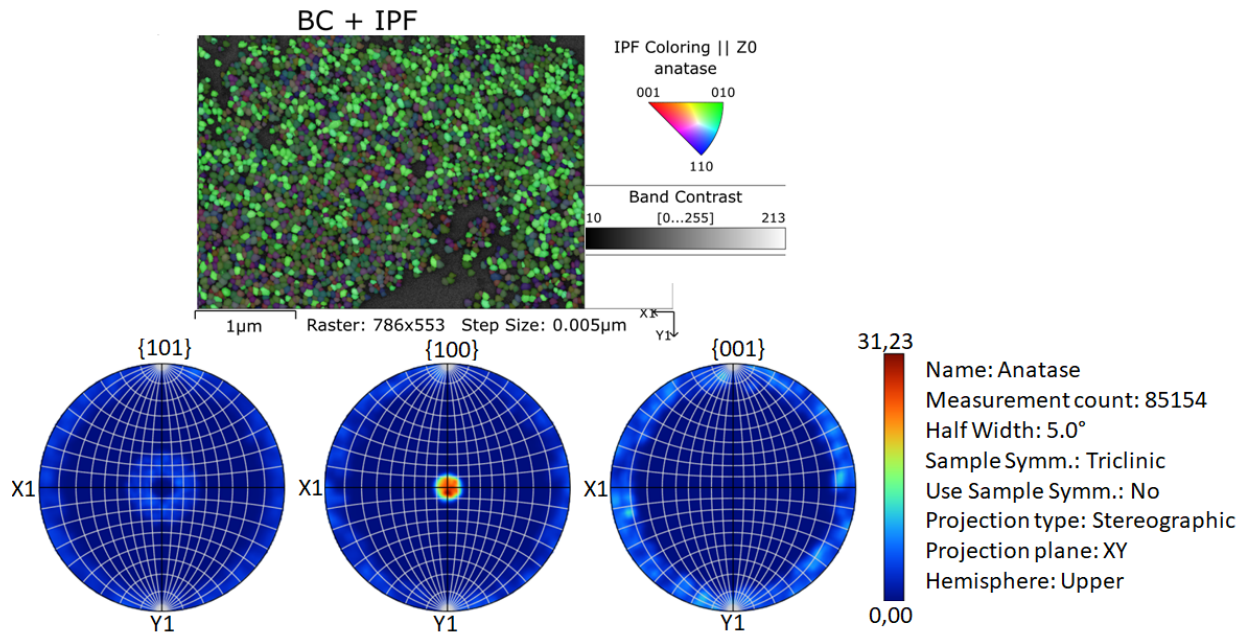

**Figure S4.** Highlighted particles lying on a {100} facet and their pole figures.

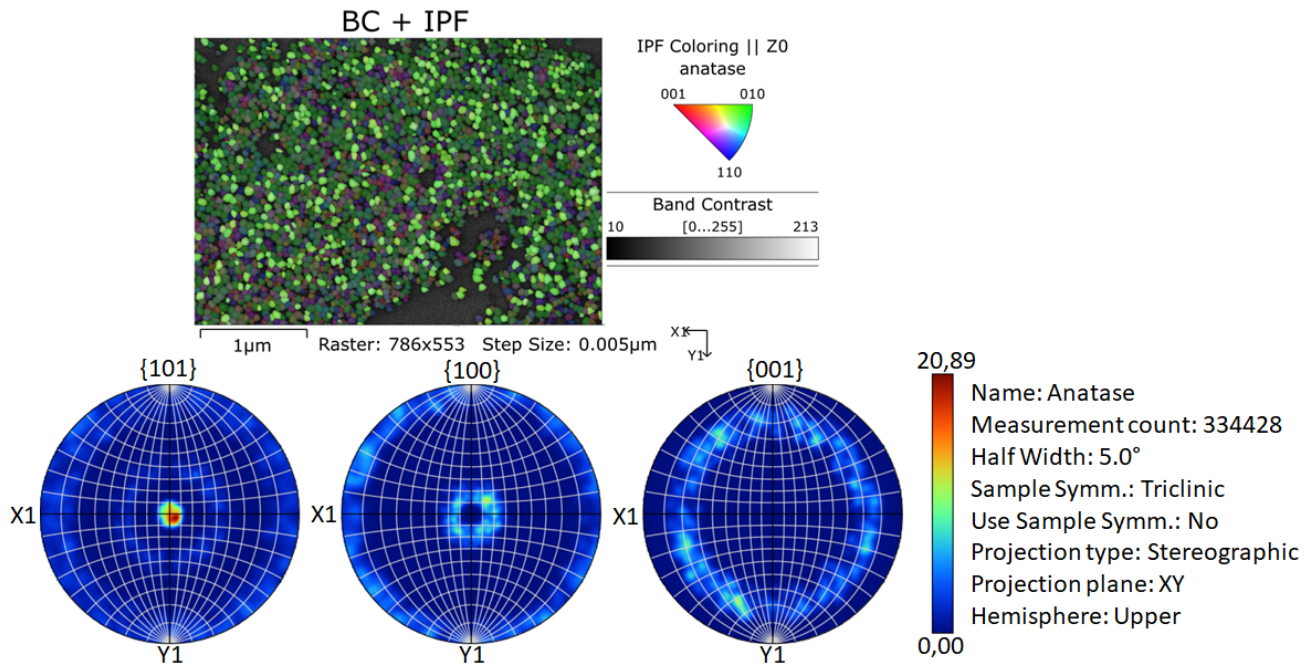

Figure S5. Highlighted particles lying on a {101} facet and their pole figures.

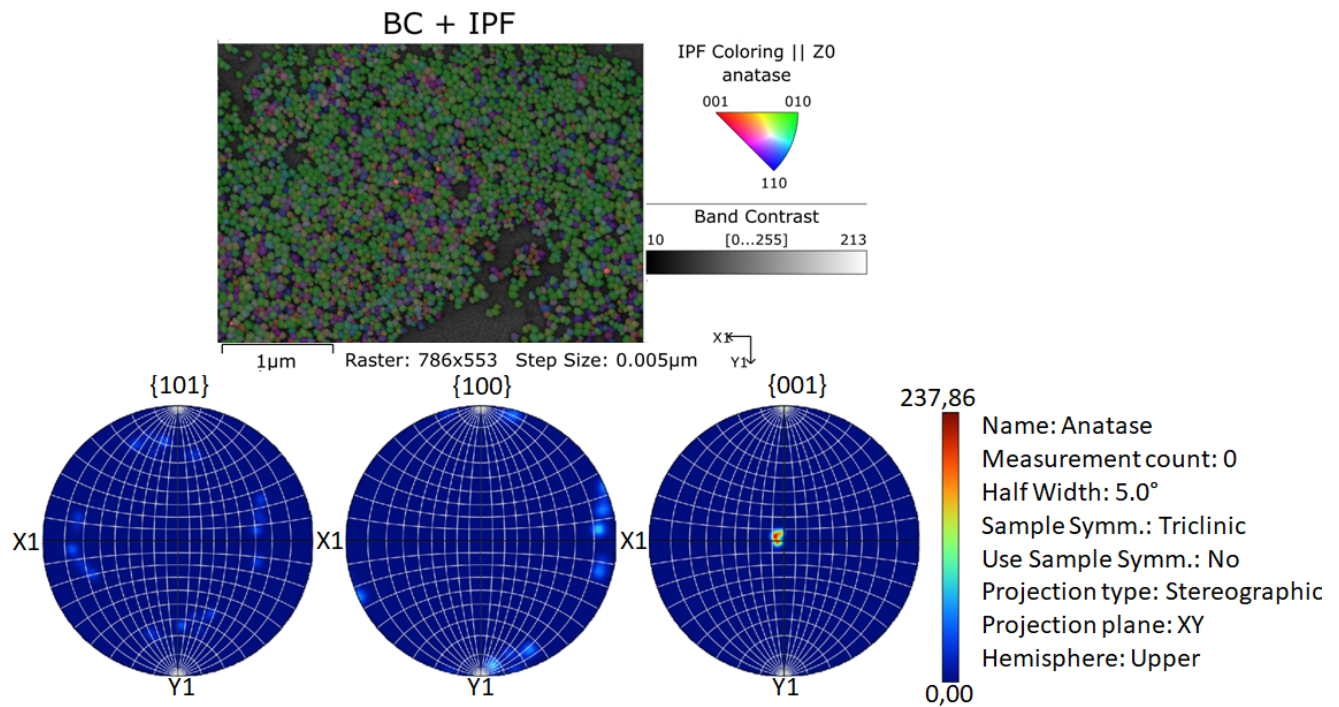

Figure S6. Highlighted particles lying on a {001} facet and their pole figures.

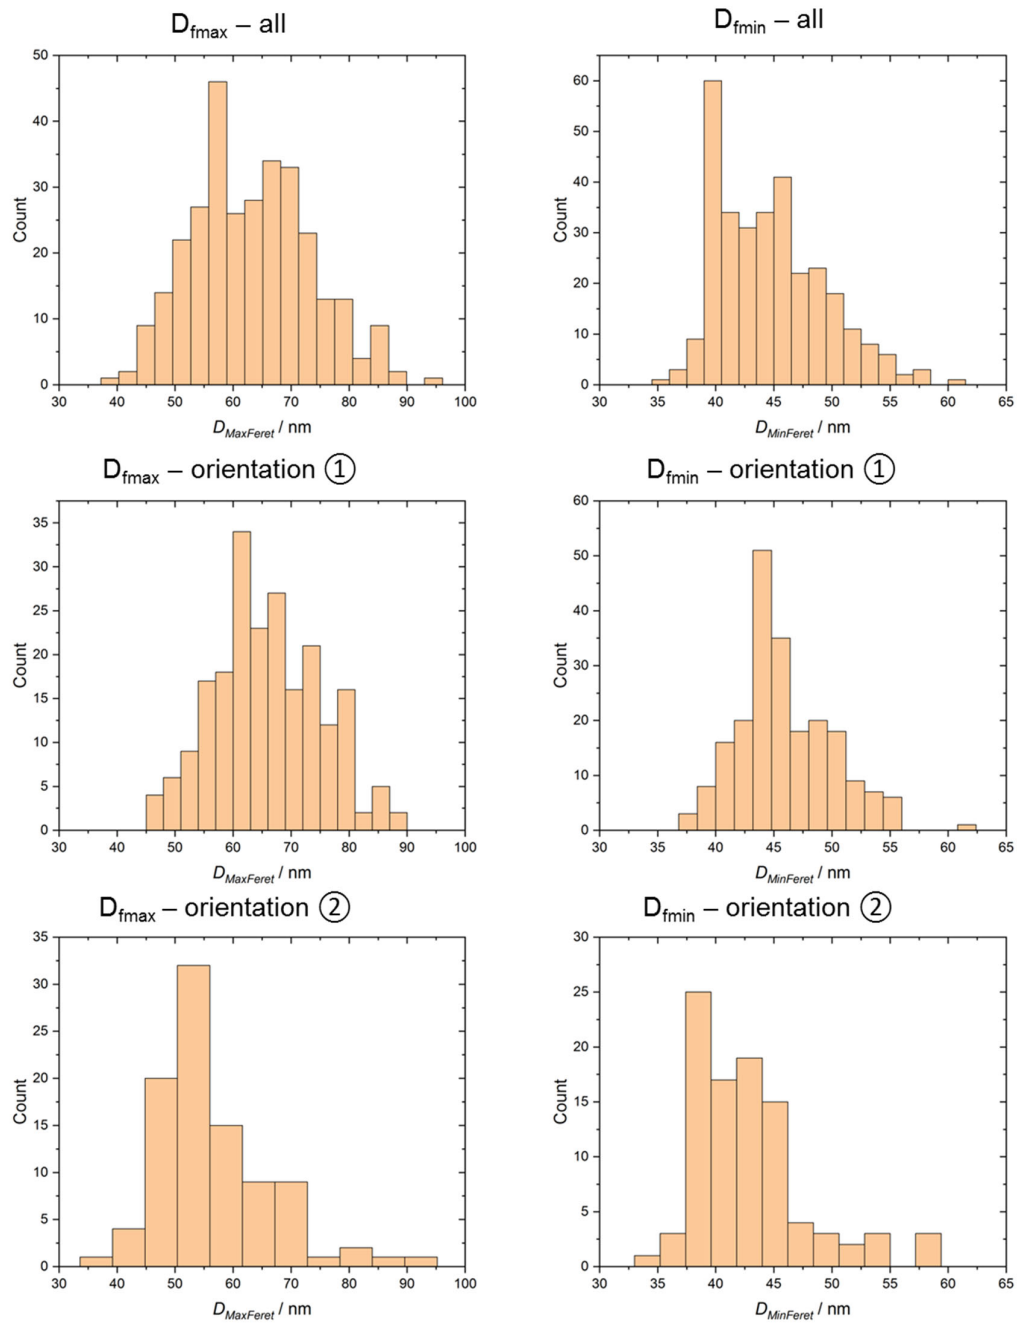

**Figure S7.** Dimensional parameters  $D_{eq}$ ,  $D_{fmin}$  and  $D_{fmax}$  as measured by Zeiss-Ultra+ SEM for each NP population fraction with the orientations ① and ② from a total of 350 particles. The bin size of histograms depends on the number of nanoparticles involved.

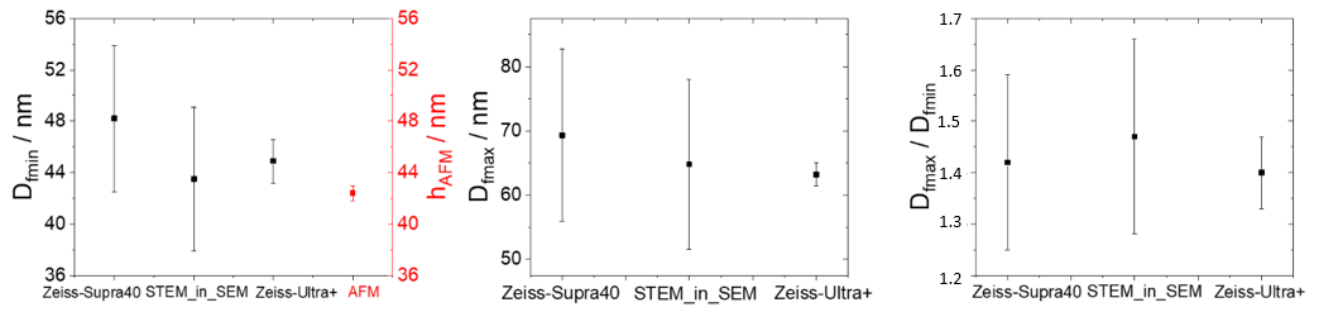

**Figure S8.** Results of  $D_{fmin}$ ,  $D_{fmax}$  and  $D_{fmin}/D_{fmax}$  with their associated uncertainties for the Zeiss-Supra40 SEM, Zeiss-Supra40 STEM-in-SEM and Zeiss-Ultra+ SEM. The  $h_{AFM}$  measurements are compared to the  $D_{fmin}$  results in the figure on the left.
